# Supplementary material
Source: MDPI journal article supplement (https://www.mdpi.com/1996-1073/15/5/1631)
Supplement: s1 [file s1]

# Radio-Oxidation of Electric Cabled Models: Ageing Evaluation at the Atomic Scale

Muriel Ferry <sup>1,\*</sup> and Frederic Miserque <sup>2</sup>

<sup>1</sup> Service d'Etude du Comportement des Radionucléides, Université Paris-Saclay, CEA, 91191 Gif-sur-Yvette, France

<sup>2</sup> Service de la Corrosion et du Comportement des Matériaux dans leur Environnement, Université Paris-Saclay, CEA, 91191 Gif-sur-Yvette, France;  
frederic.miserque@cea.fr

\* Correspondence: muriel.ferry@cea.fr

## 1. C-1s spectra

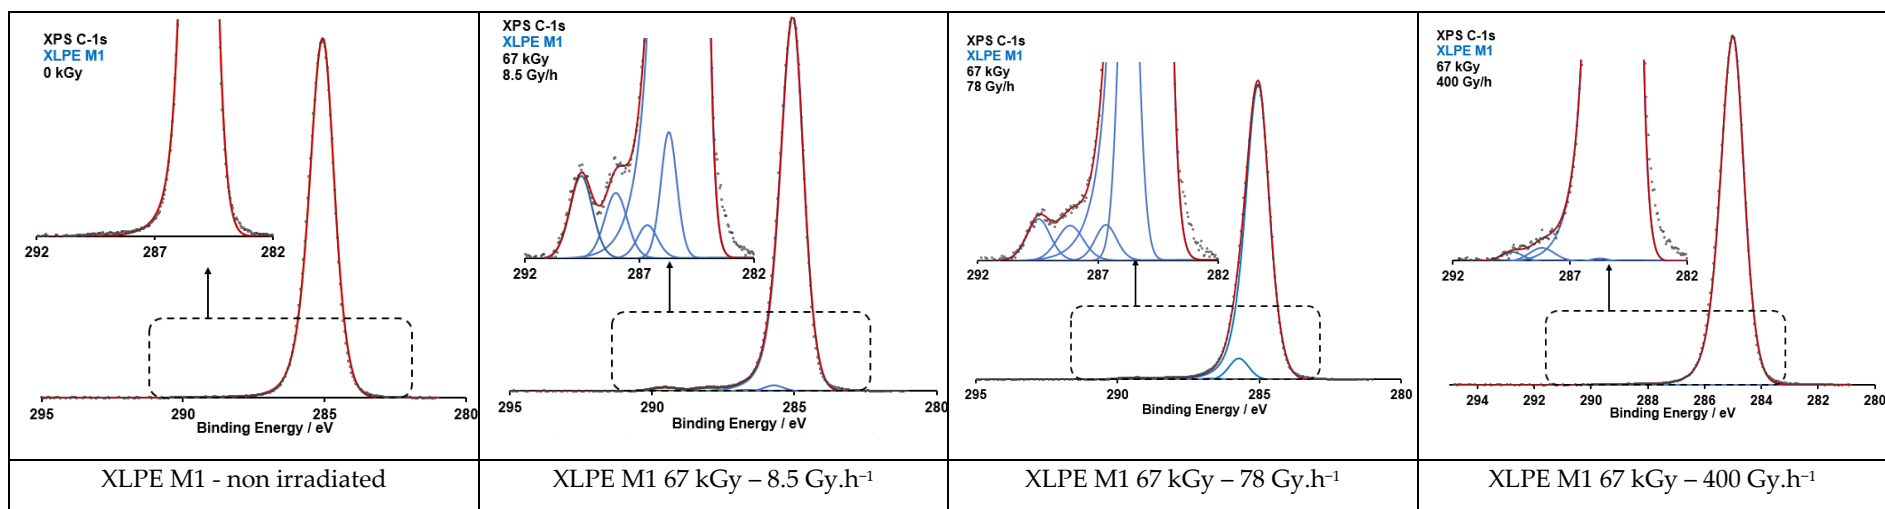

Figure S1. C-1s XPS spectra of XLPE M1 irradiated at 67 kGy and at three dose rates (i.e., 8.5, 78 and 400 Gy/h).

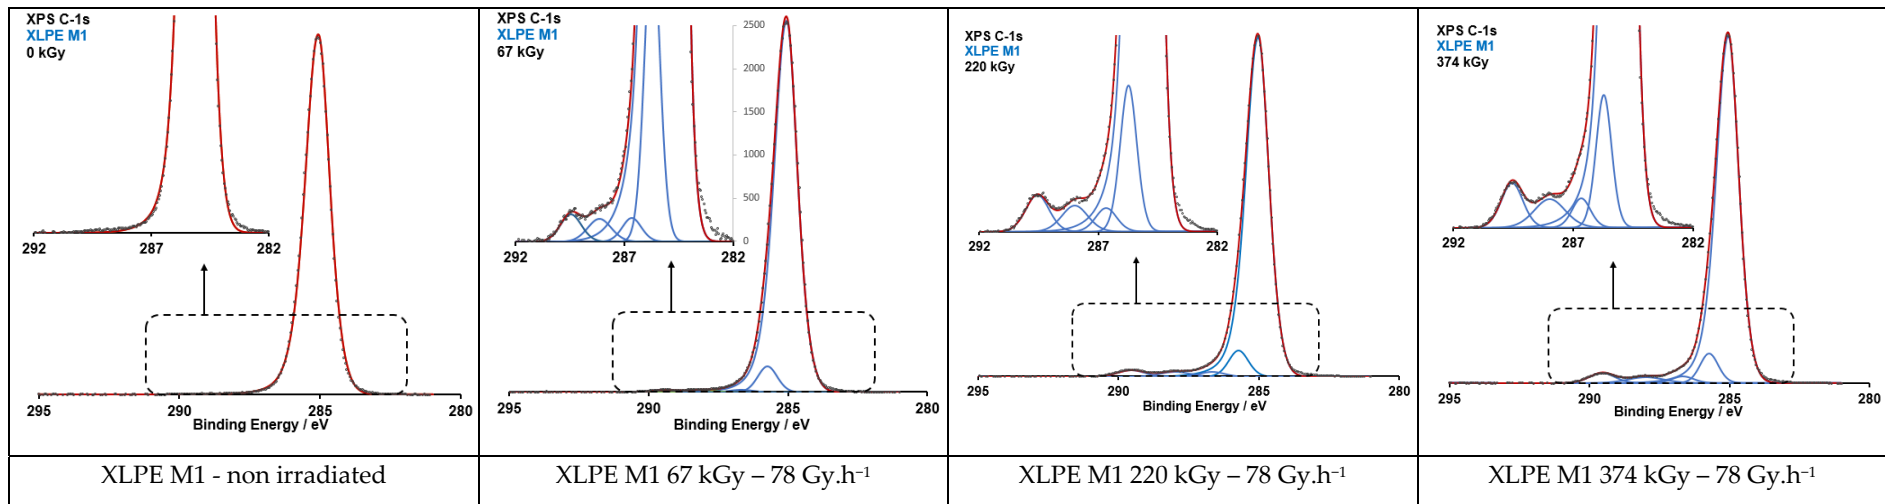

Figure S2. C-1s XPS spectra of XLPE M1 irradiated at 78 kGy/h and at three dose (0, 67, 220, 374 kGy).

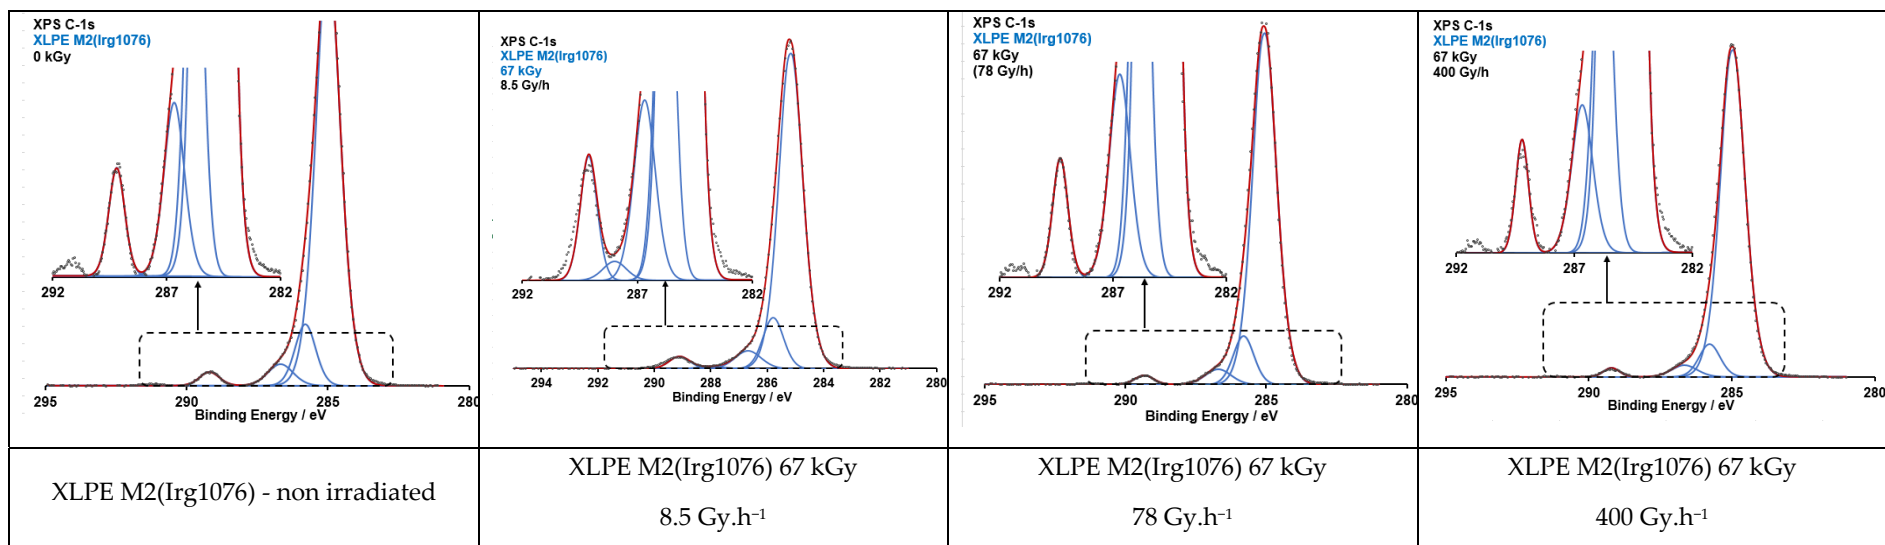

Figure S3. C-1s XPS spectra of XLPE M2(Irg1076) irradiated at 67 kGy and at three dose rates (i.e., 8.5, 78 and 400 Gy/h).

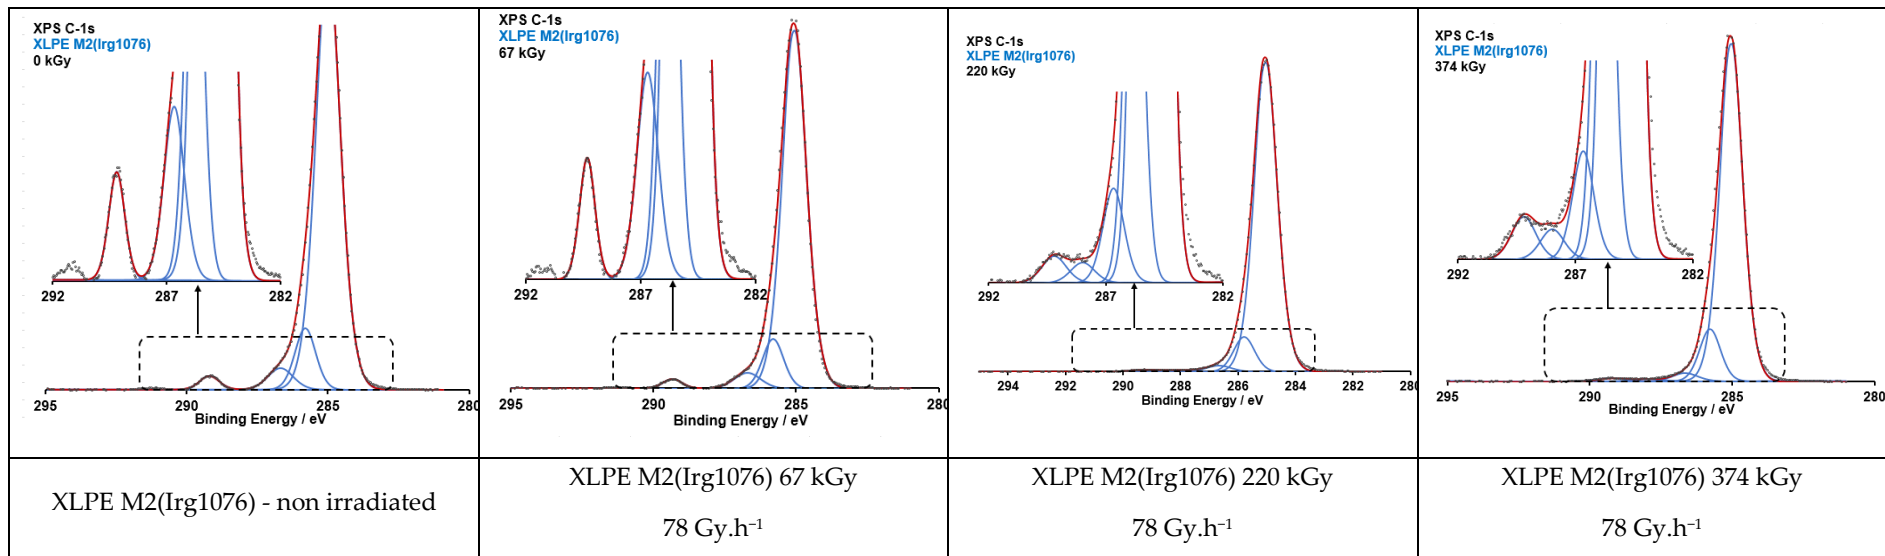

Figure S4. C-1s XPS spectra of XLPE M2(Irg1076) irradiated at 78 kGy/h and at three dose (0, 67, 220, 374 kGy).

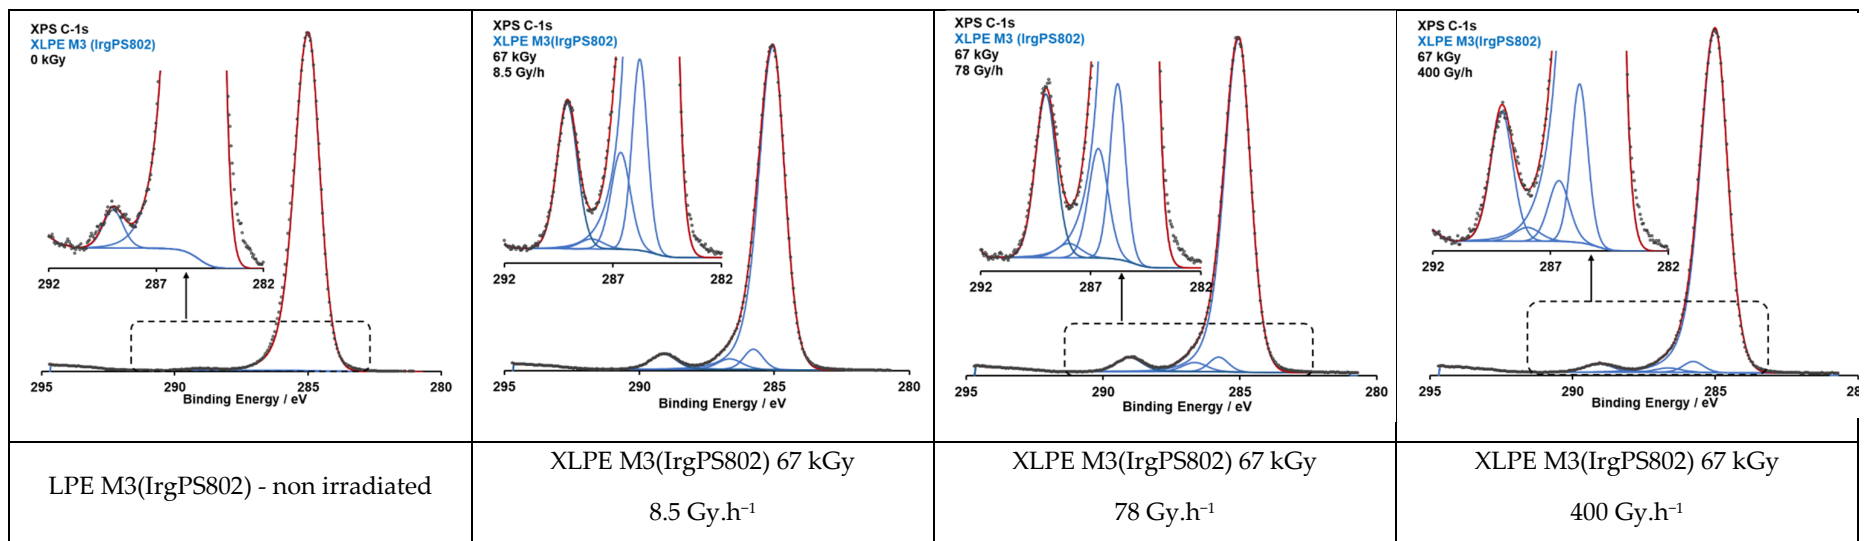

Figure S5. C-1s XPS spectra of XLPE M3(IrgPS802) irradiated at 67 kGy and at three dose rates (i.e., 8.5, 78 and 400 Gy/h).

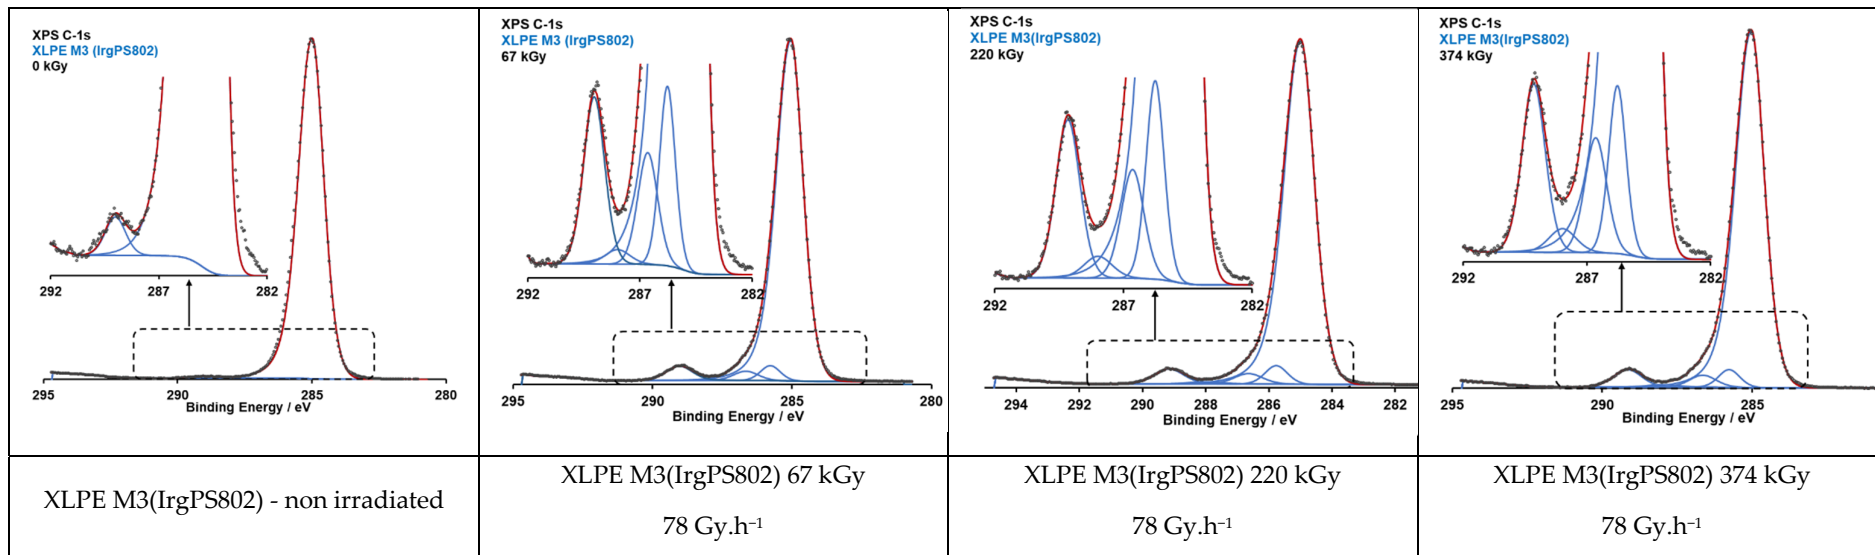

Figure S6. C-1s XPS spectra of XLPE M3(IrgPS802) irradiated at 78 kGy/h and at three dose (0, 67, 220, 374 kGy).

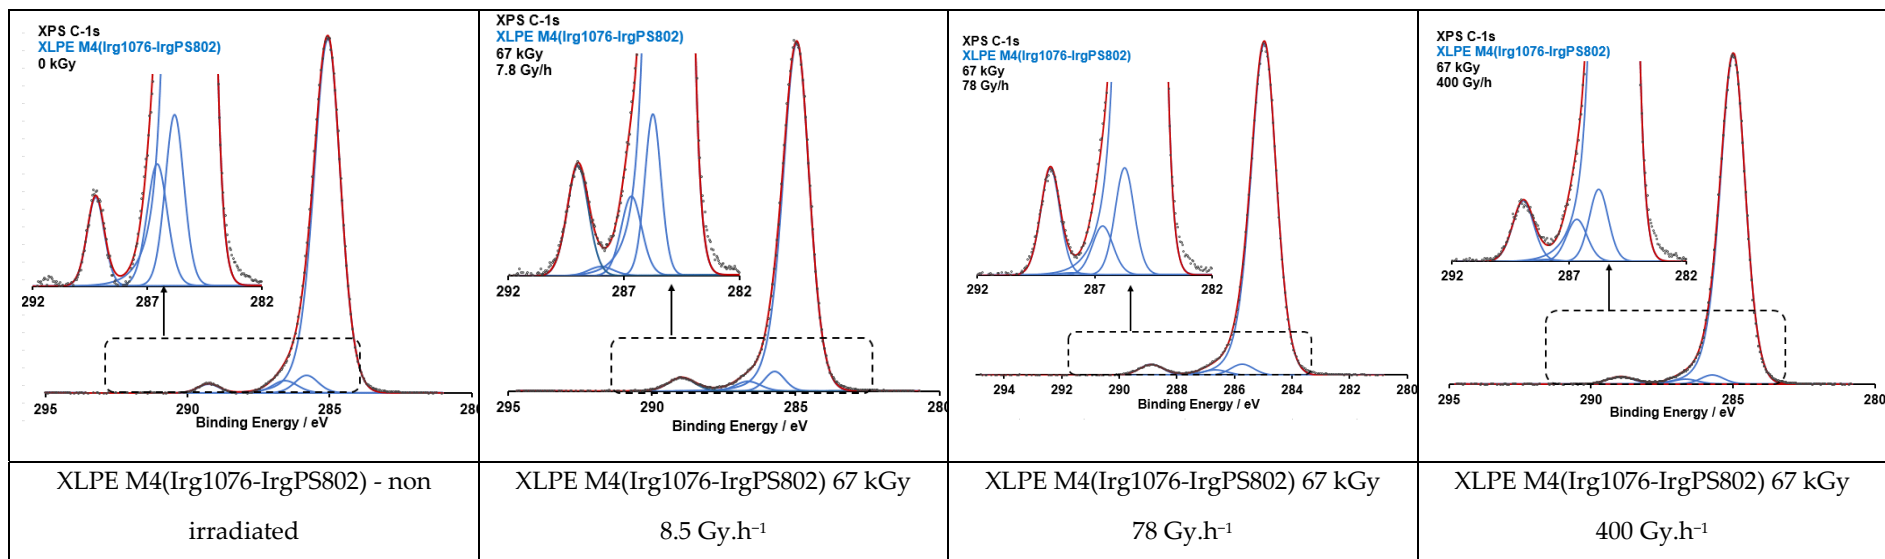

Figure S7. C-1s XPS spectra of XLPE M4(Irg1076-IrgPS802) irradiated at 67 kGy and at three dose rates (i.e., 8.5, 78 and 400 Gy/h).

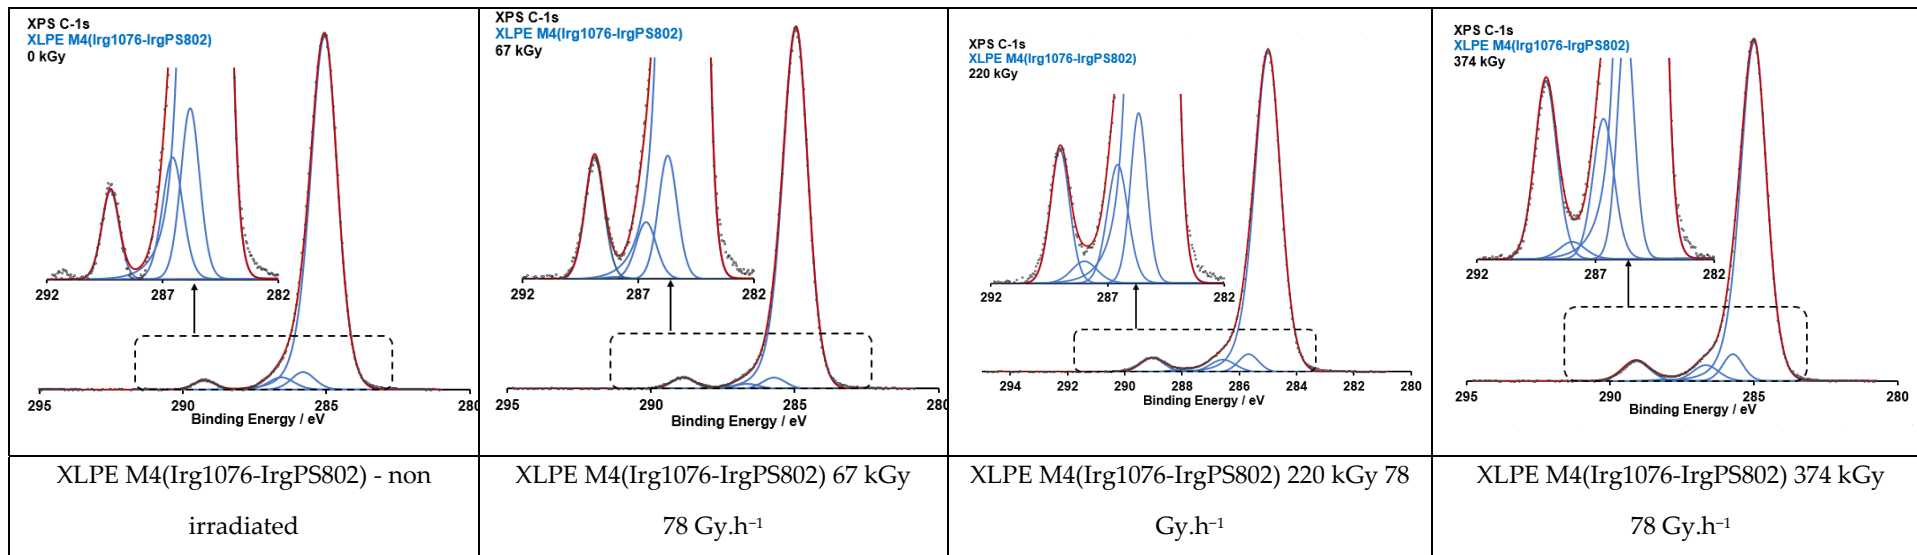

Figure S8. C-1s XPS spectra of XLPE M4(Irg1076-IrgPS802) irradiated at 78 kGy/h and at three dose (0, 67, 220, 374 kGy).

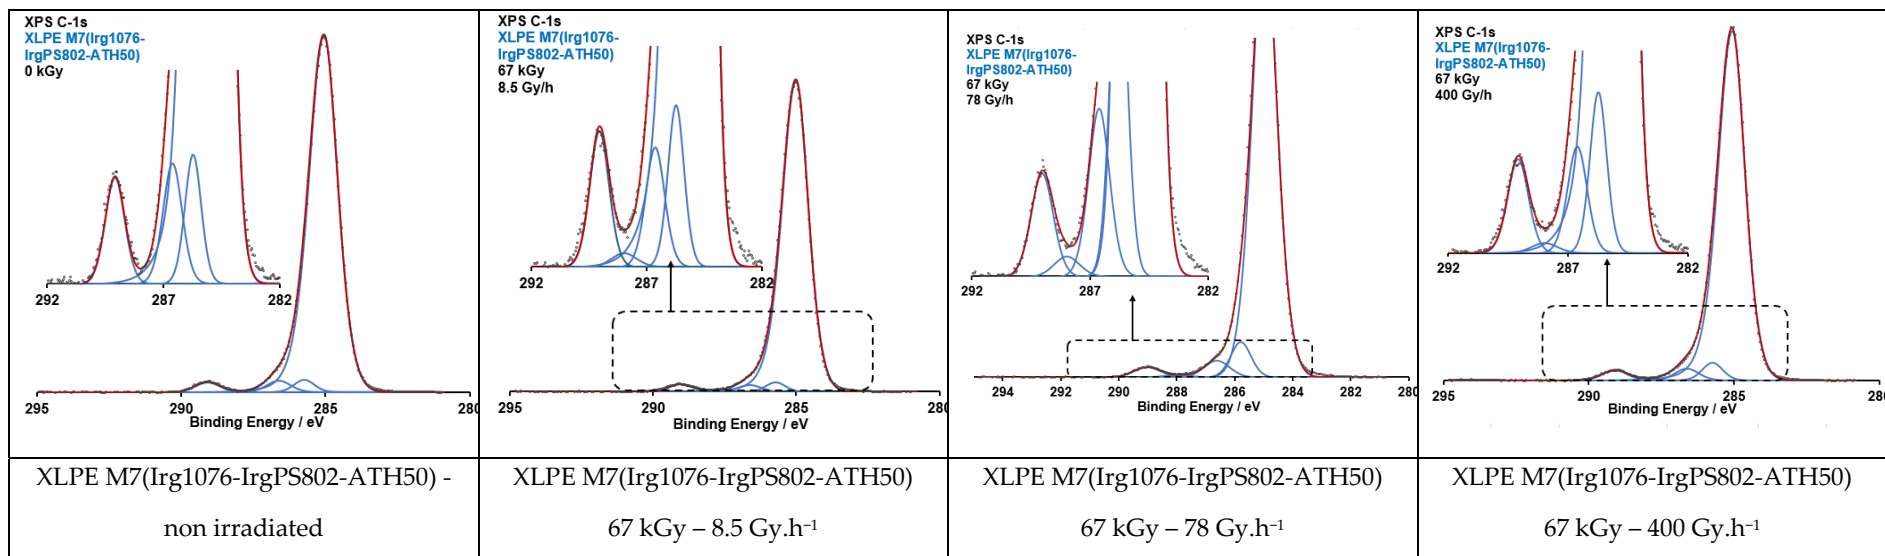

Figure S9. C-1s XPS spectra of XLPE M7(Irg1076-IrgPS802-ATH50) irradiated at 67 kGy and at three dose rates (i.e., 8.5, 78 and 400 Gy/h).

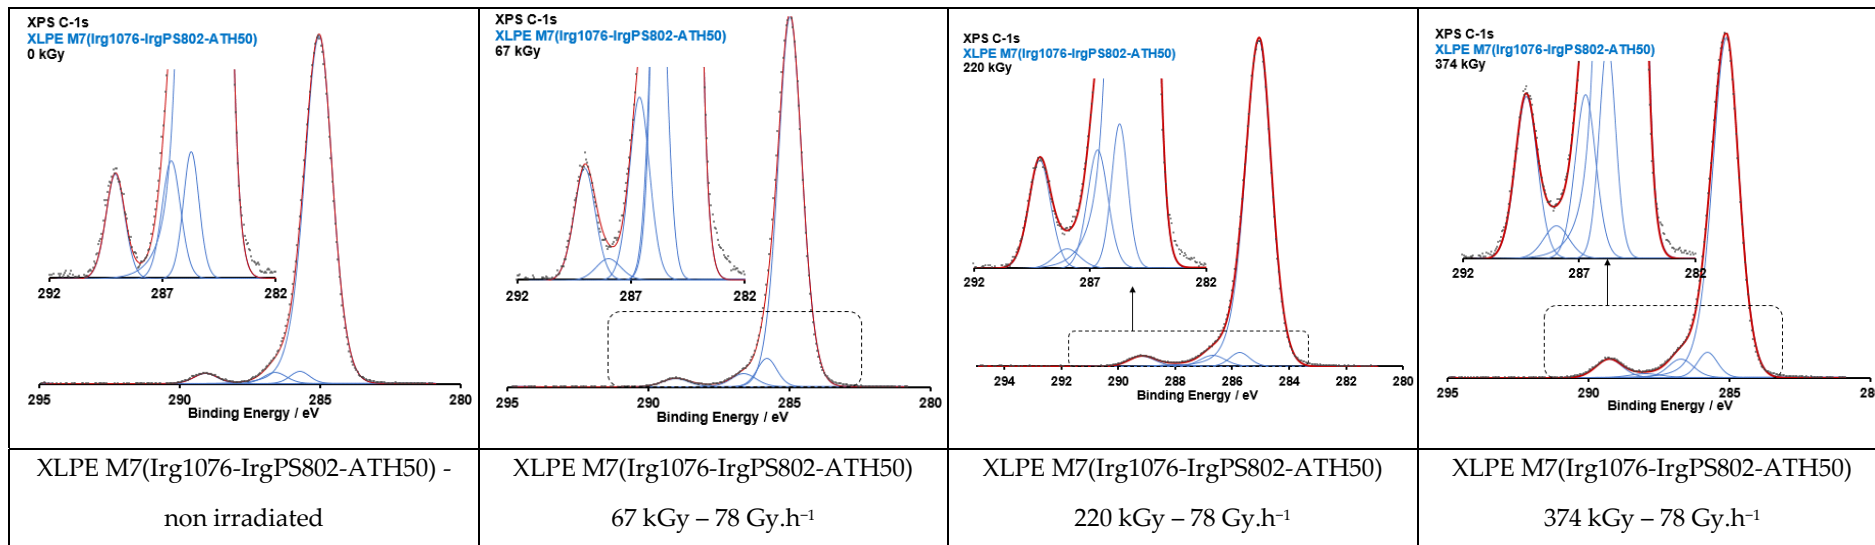

Figure S10. C-1s XPS spectra of XLPE M7(Irg1076-IrgPS802-ATH50) irradiated at 78 kGy/h and at three dose (0, 67, 220, 374 kGy).

## 2. S-2p spectra

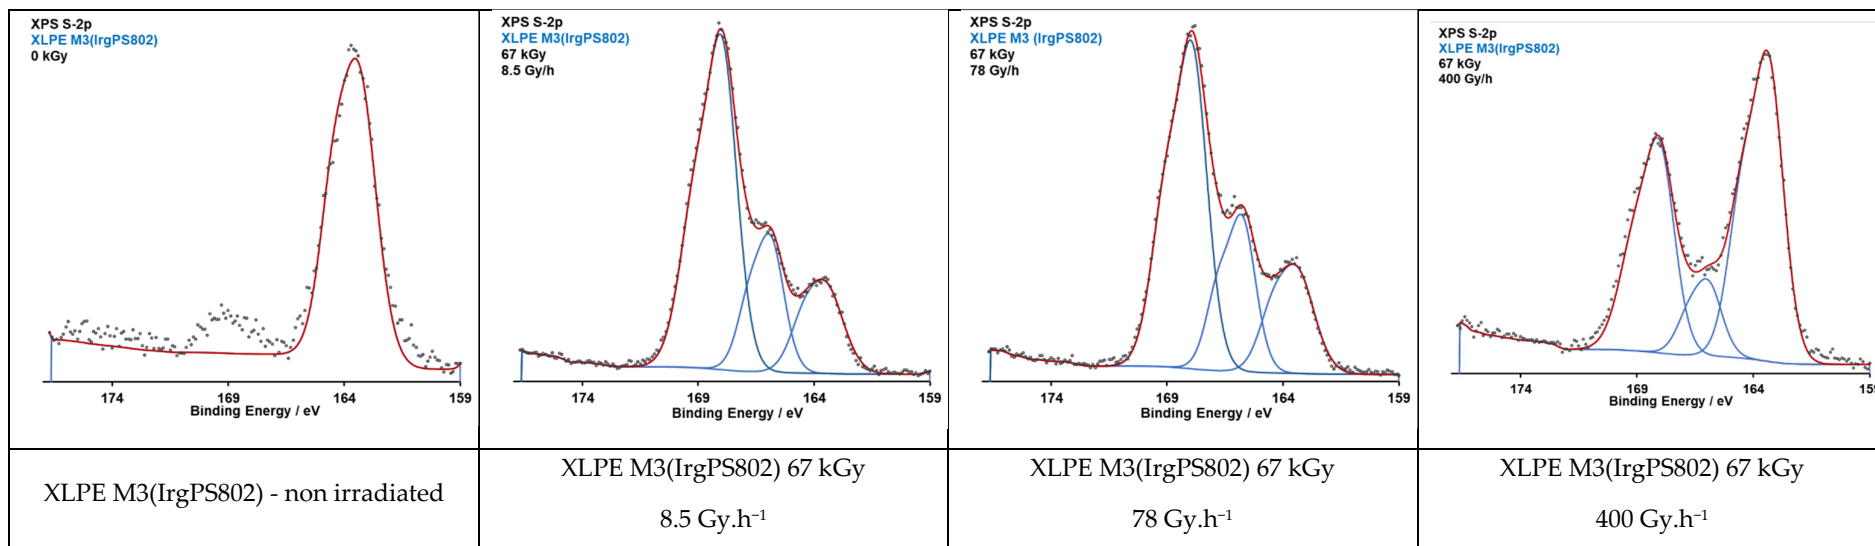

Figure S11. S-2p XPS spectra of XLPE M3(IrgPS802) irradiated at 67 kGy and at three dose rates (i.e., 8.5, 78 and 400 Gy/h).

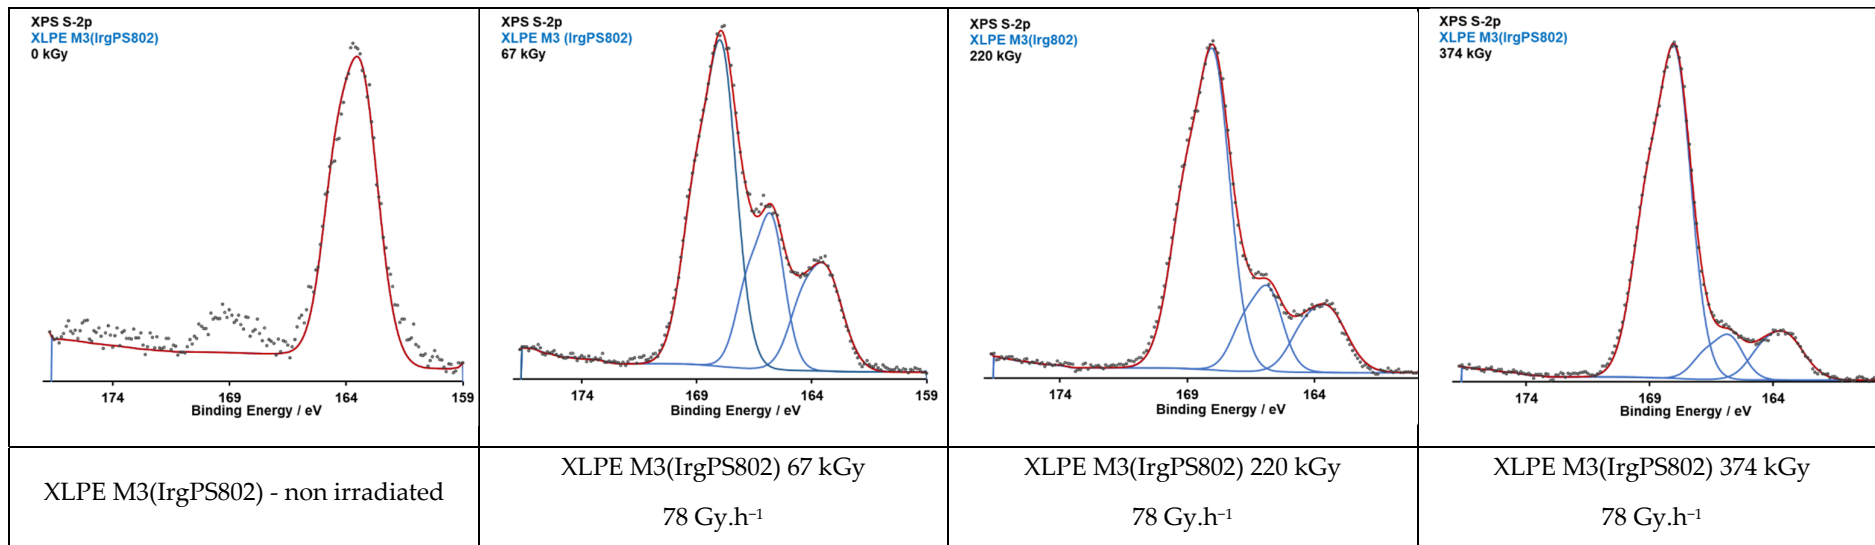

Figure S12. S-2p XPS spectra of XLPE M3(IrgPS802) irradiated at 78 kGy/h and at three dose (0, 67, 220, 374 kGy).

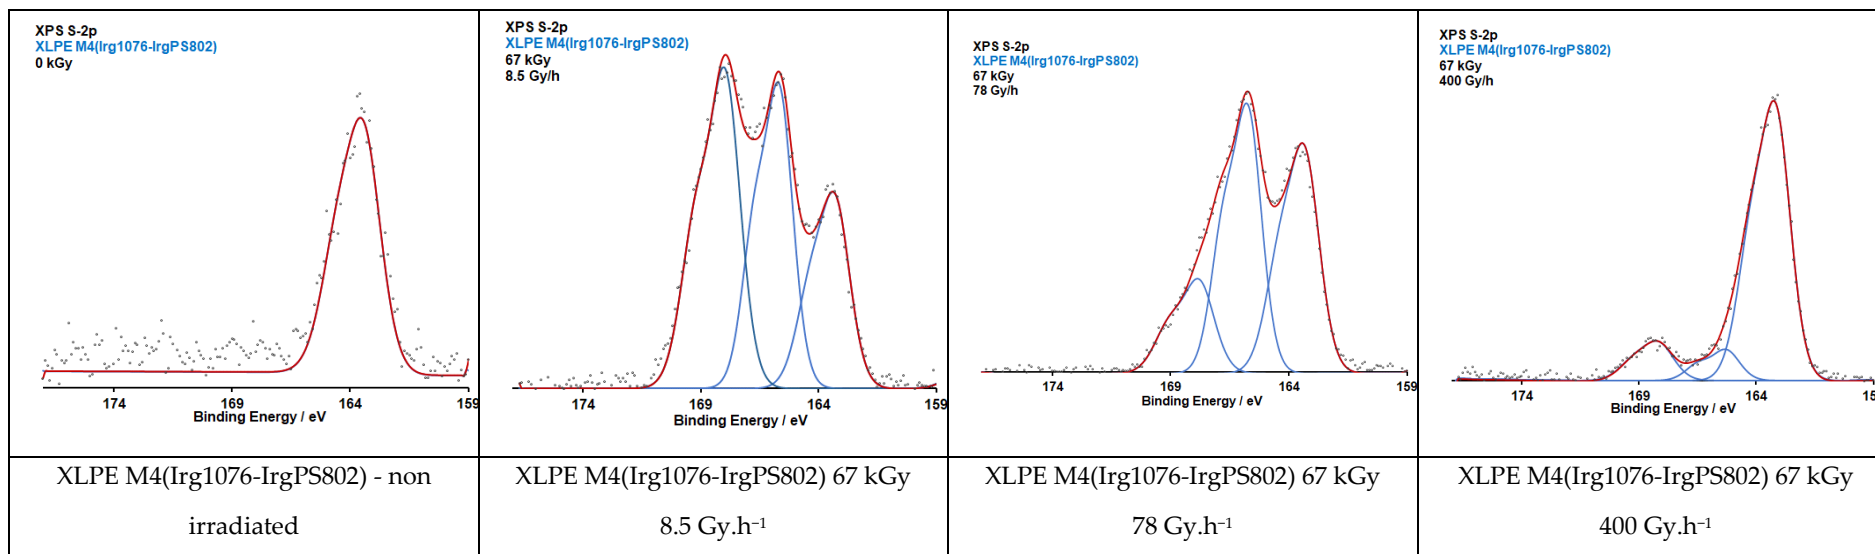

Figure S13. S-2p XPS spectra of XLPE M4(Irg1076-IrgPS802) irradiated at 67 kGy and at three dose rates (i.e., 8.5, 78 and 400 Gy/h).

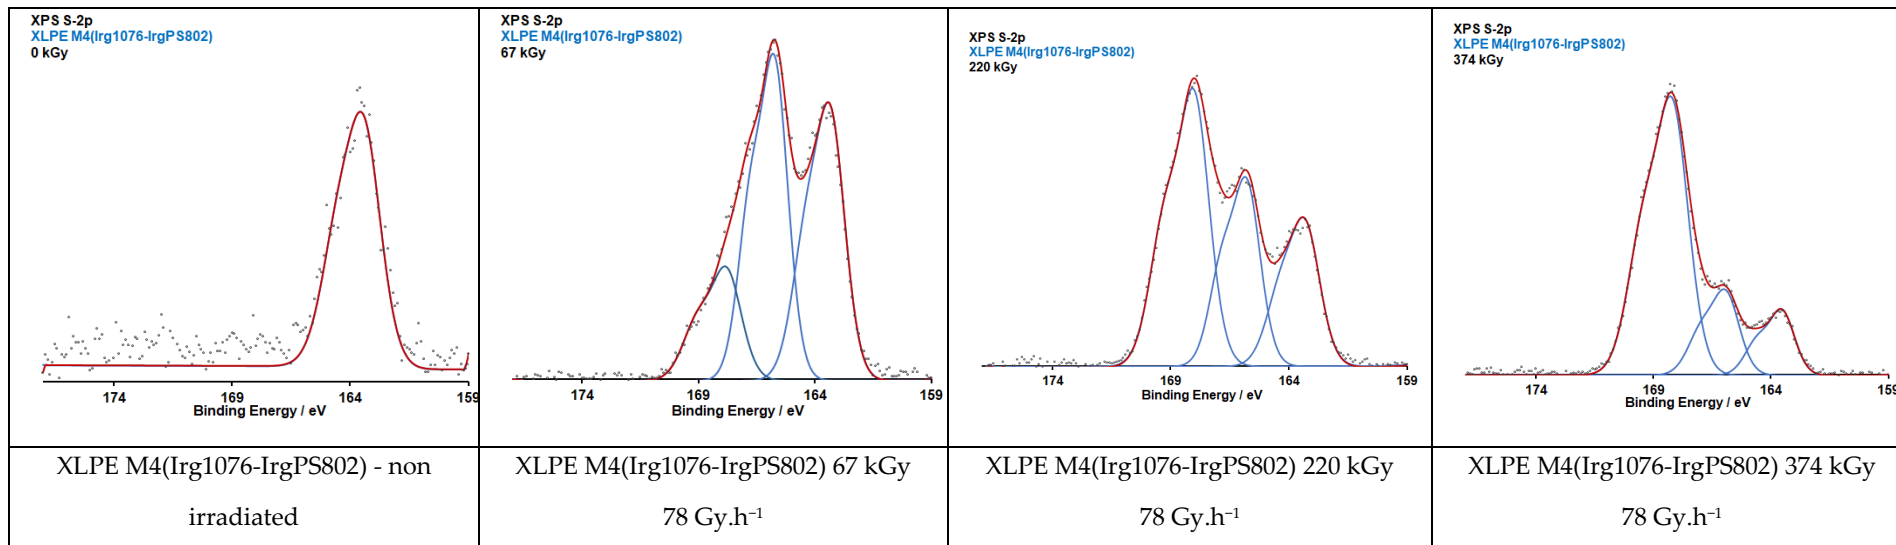

Figure S14. S-2p XPS spectra of XLPE M4(Irg1076-IrgPS802) irradiated at 78 kGy/h and at three dose (0, 67, 220, 374 kGy).

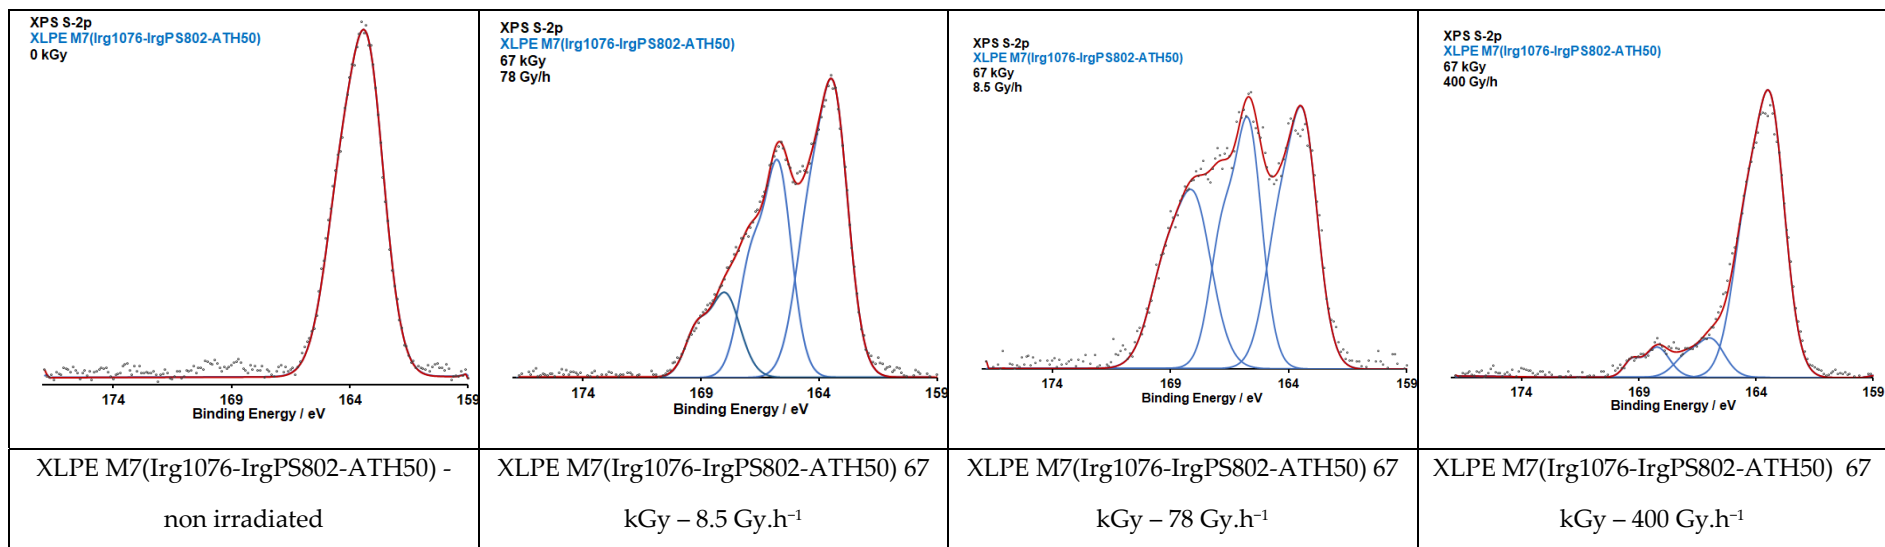

Figure S15. S-2p XPS spectra of XLPE M7(Irg1076-IrgPS802-ATH50) irradiated at 67 kGy and at three dose rates (i.e., 8.5, 78 and 400 Gy/h).

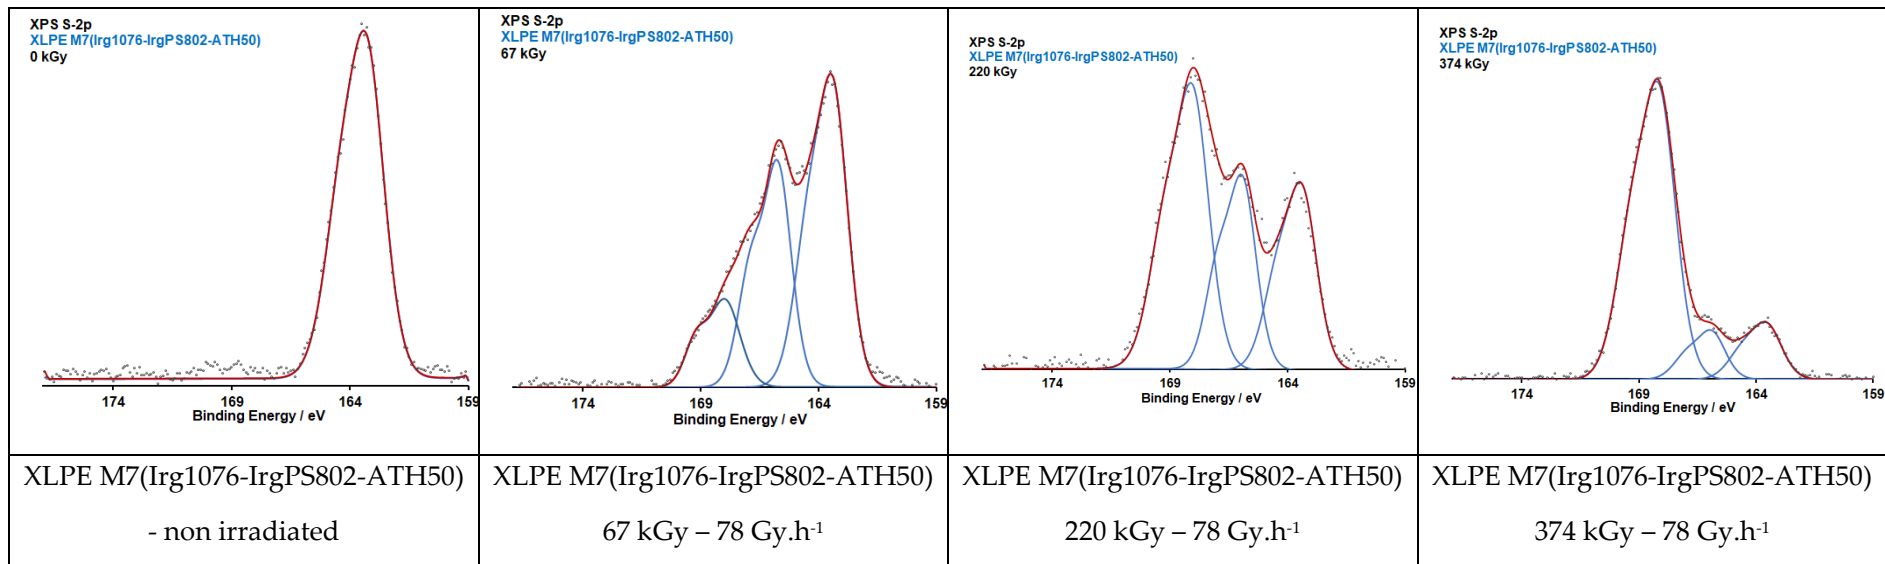

Figure S16. S-2p XPS spectra of XLPE M7(Irg1076-IrgPS802-ATH50) irradiated at 78 kGy/h and at three dose (0, 67, 220, 374 kGy).
